# Supplementary material for: Generation of a Stable Transgenic Swine Model Expressing a Porcine Histone 2B-eGFP Fusion Protein for Cell Tracking and Chromosome Dynamics Studies
Source: PLOS journal article supplement (doi:10.1371/journal.pone.0169242), 2017-01-12
Supplement: S1 (10.1371/journal.pone.0169242.s001) [file journal.pone.0169242.s001]

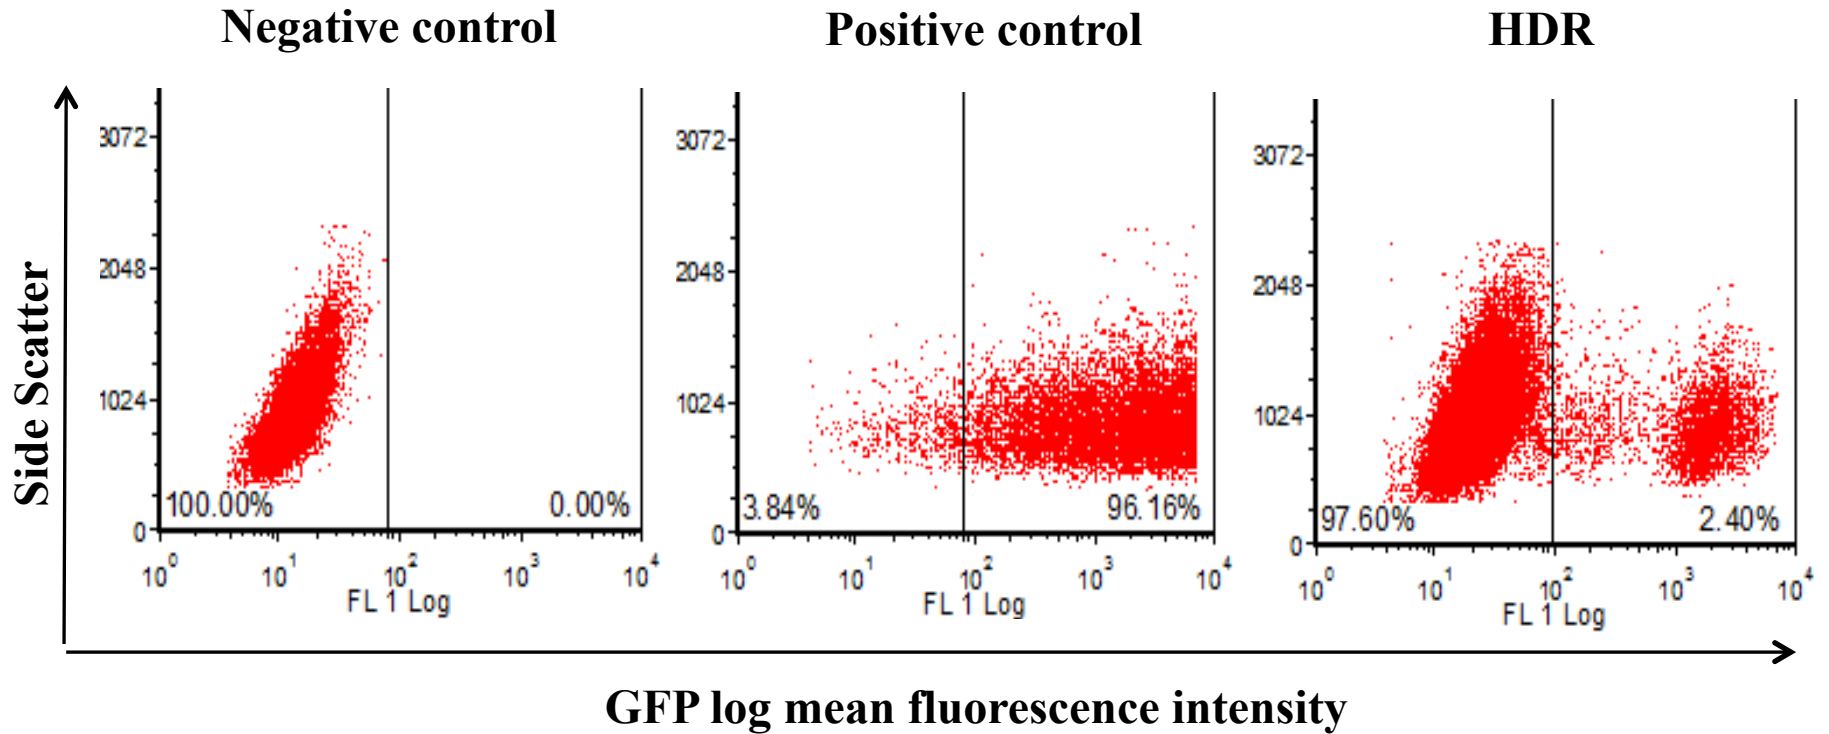

**S1 Figure. IRES-pH2B-eGFP CRISPR-Cas9 mediated homology directed repair (HDR) into the pig  $\beta$ -actin locus.**
